# Supplementary material for: BAY 80-6946 Is a Highly Selective Intravenous PI3K Inhibitor with Potent p110α and p110δ Activities in Tumor Cell Lines and Xenograft Models
Source: Oxford University Press journal article supplement (doi:10.1158/1535-7163.mct-12-0993-t), 2013-10-29
Supplement: 15357163mct120993t-sup-103401_2_supp_2056133_mq2bww.doc [file 15357163mct120993t-sup-103401_2_supp_2056133_mq2bww.doc]

**Online Supplemental Materials and Methods**

**Biochemical lipid kinase assays**

The effect of BAY 80‑6946 on PI3K, PI3K, and PI3K activity was measured by the inhibition of 33P incorporation into phosphatidylinositol (PI) in 384-well MaxiSorp® plates coated with 2 µg/well of PI and phosphatidylserine (PS) (1:1 molar ratio). In each PI3K isoform assay, 9 µL of reaction buffer (50 mM MOPSO, pH 7.0, 100 mM NaCl, 4 mM MgCl2, 0.1% BSA) containing 7.5 ng of His-tagged N-terminal truncated (N 1-108) p110 or p110protein, or 25 ng of purified human p110 protein (Alexis Biochemicals), was used. The reaction was started by adding 5 µL of a 40-µM ATP solution containing 20 µCi/mL [33P]-ATP. After 2 hours incubation at room temperature, the reaction was terminated by addition of 5 µL of a 25-mM EDTA solution. The plates were washed and Ultima Gold™ scintillation cocktail (25 µL) was then added. The radioactivity incorporated into the immobilized PI substrate was determined with a BetaPlate Liquid Scintillation Counter.

**FOXO translocation assays**

U2OS cells expressing FOXO1A-EGFP or FOXO3A-EGFP (BioImage Redistribution) were seeded in 384-well plates at a concentration of 3000 cells/well. After overnight incubation at 37ºC with 5% CO2 and 95% relative humidity, the cells were incubated with varying concentrations of test compounds for 75 minutes. Nuclear staining was conducted by adding DRAQ5 solution in cell culture medium for 10 minutes at room temperature. The medium was then removed and the cells were fixed with 4% PFA solution for 5 minutes. Thereafter, the cells were washed once with PBS and scanned with an OPERA™ HCS system. The FOXO nuclear translocation was analyzed with MetaXpress®.

**Proliferation assays**

Cell proliferation over a 72-hour period was determined using the CellTiter-Glo® luminescent cell viability kit (Promega). Briefly, cells were plated in separate microtiter plates. Following an overnight incubation at 37ºC, luminescence values in the t=0 hour plates were determined. Test compounds diluted in growth medium were added to the t=72 hour plates, and the cells were then incubated for 72 hours at 37ºC. Luminescence values were determined with a Wallac 1420 Victor2™ 1420 multilabel HTS counter after a 10-minute reaction with CellTiter-Glo® solution. The percentage inhibition of cell growth was calculated by subtracting the luminescence values in the t=0 hour plates from the corresponding values in the t=72 hour plates. Differences in values between drug-treated cells and controls were used to determine the percentage inhibition of cell growth.

**Pharmacokinetics and pharmacodynamics in tumor specimens**

The pharmacodynamic effects of BAY 80-6946 were evaluated in H460 tumor specimens collected from nude mice that received a single i.v. dose. Tumor samples were collected at several time points over a 96-hour period after dosing and were divided into three parts. Two specimens were snap frozen immediately after harvesting and stored at –80ºC, and later processed for measurement of tumor drug levels and pAKT levels, respectively. The third fragment was fixed in formalin and processed for immunohistochemical analysis. In addition, the animals underwent fluorodeoxyglucose-positron emission tomography (FDG-PET) scanning before and at 24 and 48 hours after dosing. Concentrations of BAY 80-6946 were determined in plasma and tumor lysates by HPLC-tandem mass spectrometry after protein precipitation with acetonitrile and addition of a labeled internal standard ([13C, 15N3]-BAY 80-6946). The assay has a lower limit of quantitation (LLOQ) of 1 µg/L for all species. The level of AKT phosphorylation at S473 in the tumor specimens was determined using a kit purchased from Meso Scale Discovery (Gaithersburg, MD). The assay was performed according to the manufacturer’s protocol. Paraffin sections of the tumor specimens were immunostained with antibodies directed against pAKT, p‑histone H3 (both Cell Signaling, Beverly, MA), or Ki67 (Lab Vision, Freemont, CA) on a Dako Autostainer, model LV (DakoCytomation, Carpinteria, CA).

**Supplemental tables**

| **Supplemental Table S1. Combination effects of BAY 80-6946 and lapatinib on caspase 9 activation in BT474 cells** | | | | | | | |
| --- | --- | --- | --- | --- | --- | --- | --- |
| Concentration ratio of  BAY 80-6946* vs lapatinib | BAY 80-6946* only | 2:1 | 3:4 | 1:3 | 1:8 | 1:18 | Lapatinib only |
| BAY 80-6946 (nM) at EC50 | 340 | 96 | 87 | 61 | 63 | 48 | 0 |
| Lapatinib (nM) at EC50 | 0 | 48 | 116 | 184 | 503 | 864 | >10000 |
| Combination Index |  | 0.24 | 0.27 | 0.20 | 0.24 | 0.23 |  |

The effects of combining BAY 80-6946 with lapatinib were evaluated using combination index analysis. The efficacy parameters were the median effects in a 48-hour caspase 9 activation assay. BT474 cells were treated either BAY 80-6946, or Lapatinib, or the combination of BAY 80-6946 plus Lapatinib at different ratios indicated above. Response curves were generated by serial three-fold dilutions at 7 concentrations. Experiments were conducted in triplicate. The mapping EC50s were calculated using an Analyze5 computer program. The corresponding component doses of BAY 80-6946 and Lapatinib at the EC50 were calculated. The combination index was calculated using the formula: Combination Index = [D1x]/ D1’ + [D2x]/ D2’, where [D1x] and [D2x] refer to BAY 80-6946 and Lapatinib concentration at EC50 in combination. D1’ and D2’ refer to the EC50 values of BAY 80-6946 and Lapatinib, respectively, as a single agent. Combination indices of 0-0.3, 0.3-0.6, and 0.6-0.9 were defined to indicate very strong synergy, strong synergy and synergy, respectively.

**Supplemental Table S2. Single dose i.v. pharmacokinetic parameter of BAY 80-6946 in female nude rats and ICR mice (n=3 per timepoint)**

|  | **Rats** | **Mice** | |
| --- | --- | --- | --- |
| Cl (L/kg*h) | 3.95 | | 15.97 |
| Vss (L/kg) | 32.0 | | 12.9 |
| T1/2 (h) | 6.0 | | 0.7 |
| AUC Norm(0-Inf) (kg*h/L) | 0.253 | | 0.063 |

Single dose i.v. studies were performed in nude rats and ICR mice (2-3 animals per timepoint) to determine the pharmacokinetic properties of BAY 80-6946. BAY 80-6946 was formulated in PEG400/acidified water (0.1 N HCl, pH 3.5; 20/80, v/v) and administered as an intravenous bolus dose in the tail vein at 1 mg/kg (2 mL/kg for rats and 10 mL7kg for mice). AUC: arithmetic mean concentration vs time curves; Vss: volume of distribution; T1/2: elimination half-life; Cl: drug plasma clearance.

**Supplemental Table S3. Combination effects of BAY 80-6946 and paclitaxel in patient-derived NSCLC xenograft tumor model**

| **Assessment time** | **day 33** | | |  | **day 55** | |
| --- | --- | --- | --- | --- | --- | --- |
| **Compound** | **Paclitaxel**  **24 mpka, QWb** | | **BAY 80-6946 10 mpk, BIDc/week + paclitaxel 24 mpk, QW** |  | **Paclitaxel**  **24 mpk, QW** | **BAY 80-6946 10 mpk, BID/week + paclitaxel 24 mpk, QW** |
| Response rate | 70% | 100% | |  | 30% | 100% |
| Number of animals with CRd | 2 | 5 | |  | 3 | 6 |
| Number of animals with PRe | 5 | 5 | |  | 0 | 4 |
| Number of animals with SDf | 2 | 0 | |  | 1 | 0 |
| Number of animals with PDg | 1 | 0 | |  | 6 | 0 |
| **Significance** | **P = 0.048** | | |  | **P = 0.006** | |

*In vivo* experiments were described in Figure 6 and materials and methods. a: mpk, mg/kg; b: QW, once a week; c: BID, twice a day; d: CR, complete regression; e: PR, partial regression; f: SD, stable disease; g: PD, progressive disease.

**Supplemental Figures**

**Supplemental Figure S1**

**A B**

[
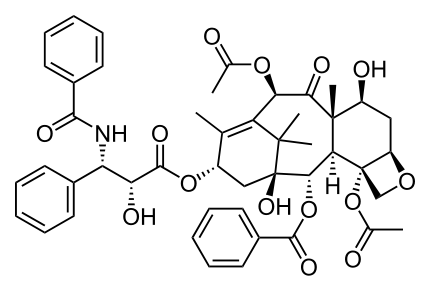
](http://upload.wikimedia.org/wikipedia/commons/5/59/Taxol.svg) [
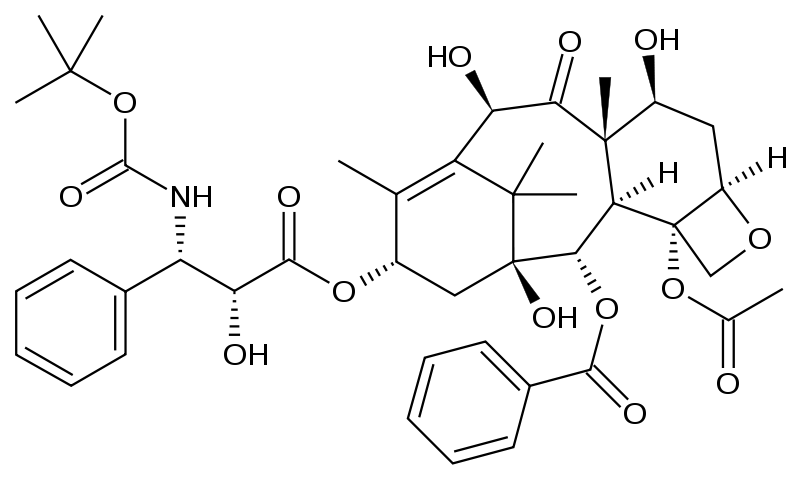
](http://upload.wikimedia.org/wikipedia/commons/0/0d/Docetaxel.svg)

Paclitaxel Docetaxel

**C D**

[
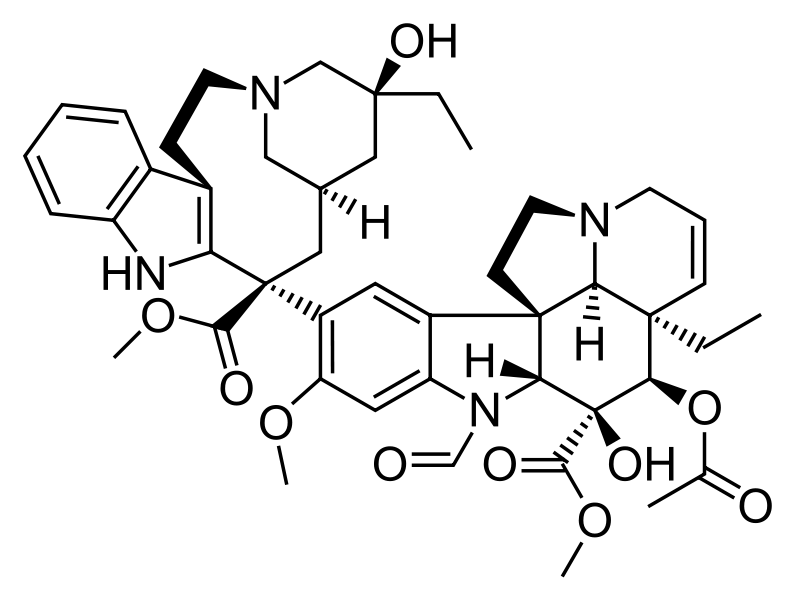
](http://upload.wikimedia.org/wikipedia/commons/b/bf/Vincristine.svg) [
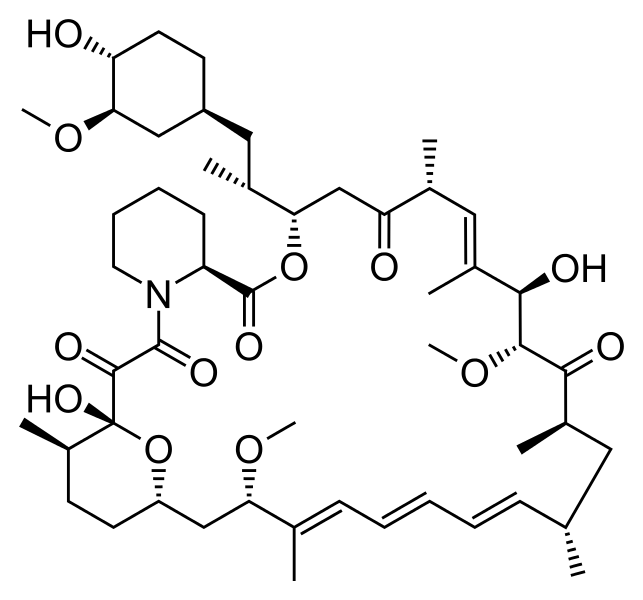
](http://upload.wikimedia.org/wikipedia/commons/0/0f/Sirolimus.svg)

Vincristine Rapamycin

**E F G**

[
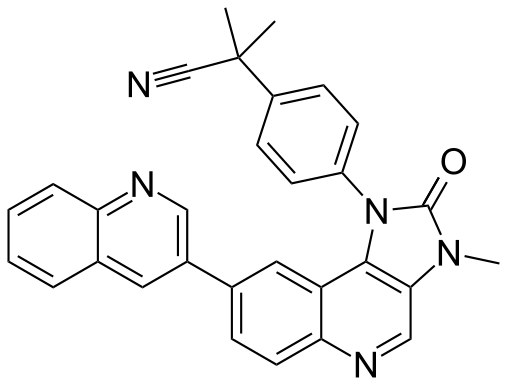
](http://upload.wikimedia.org/wikipedia/commons/c/ce/BEZ235.svg)
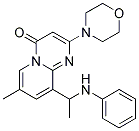

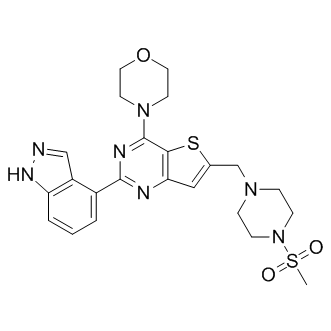


BEZ-235 TGX-211 GDC-0941

**Supplemental Figure S1: Chemical structure of reference compounds**. A: paclitaxel; B: docetaxel; C: vincristine; D: rapamycin; E: BEZ-235; F: TGX-221; G: GDC-0941. BEZ-235 was synthesized at Bayer HealthCare. TGX-221 was purchased from Axon Medchem. All compounds have a purity level > 95%. Paclitaxel (PZN- 8409272, Iapharm), Docetaxel (PZN-5859394, Sanofi Aventis), rapamycin (Sigma-Aldrich) and vincristine (sulfate salt, Sigma-Aldrich) were purchased from the indicated vendors.

**Supplemental Figure S2**


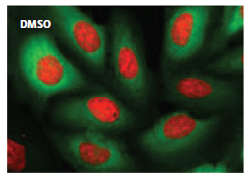

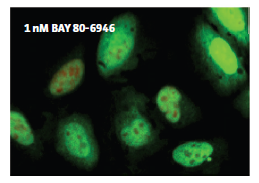


**Supplemental Figure S2.** Nuclear translocation of FOXO1A in U2OS cells. U2OS cells expressing FOXO1A-EGFP or FOXO3A-EGFP (BioImage Redistribution) were treated with 1 nM BAY 80-6946 or 0.1% DMSO for 75 minutes. Nuclear DNA was stained with DRAQ5 (red) and cell imaging was scanned with an OPERA™ system.

**Supplemental Figure S3**


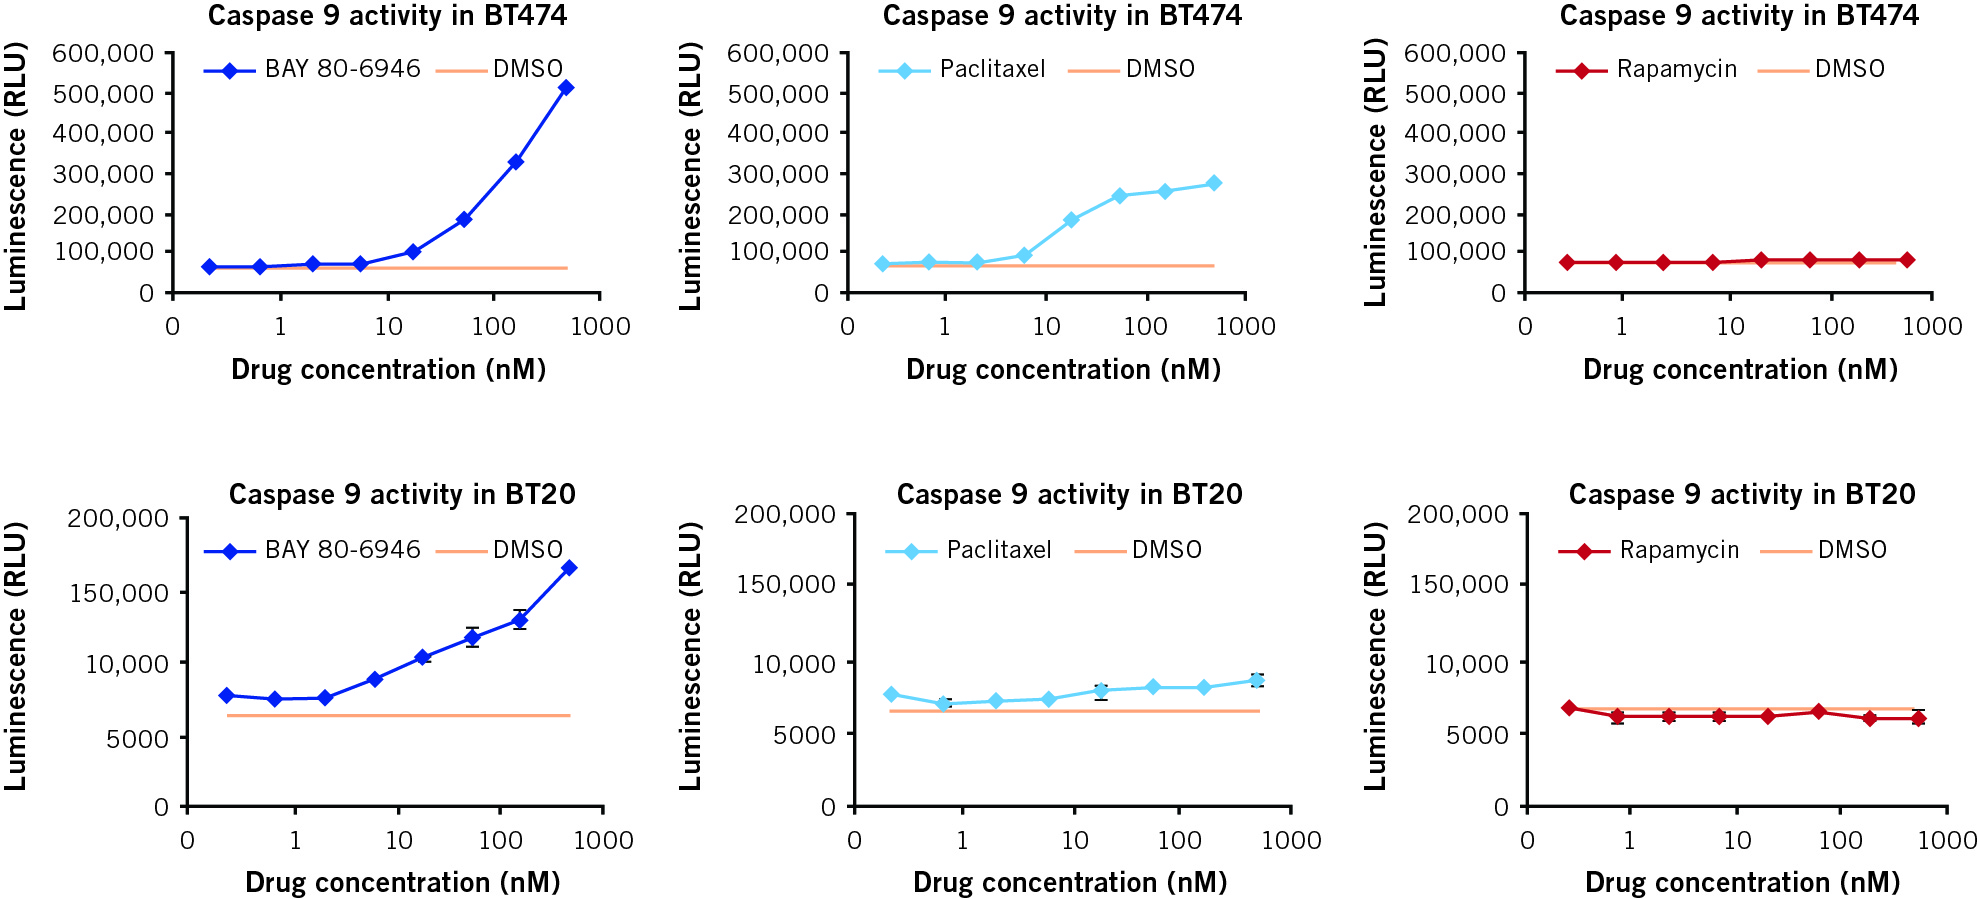


**Supplemental Figure S3.** Caspase 9 activity in BT474 and BT20 cells measured 24 hours after exposure to BAY 80-6946 and reference drugs.

**Supplemental Figure S4.**

**Supplemental Figure S4.** Single and multiple dose i.v. plasma concentration versus time profile of BAY 80-6946 in female nude rats (n=2 per timepoint). BAY 80-6946 was formulated in PEG400/acidified water (0.1 N HCl, pH 3.5; 20/80, v/v) and administered as an intravenous bolus dose in the tail vein at 1 mg/kg (single dose) and 0.8 mg/kg (multiple doses) with a volume of 2 mL/kg.
